# Supplementary material
Source: PubMed Central journal article supplement (PMC7687030)
Supplement: JCB909055_Supplemental_Material.pdf [file JCB909055_Supplemental_Material.pdf]

## SUPPLEMENTARY DATA

### **CCR2-deficiency in monocytes impairs angiogenesis and functional recovery after ischemic stroke in mice**

Jordi Pedragosa<sup>1,2</sup>, Francesc Miró-Mur<sup>2,3</sup>, Amaia Otxoa-de-Amezaga<sup>1,2</sup>, Carles Justicia<sup>1,2</sup>, Francisca Ruíz-Jaén<sup>1,2</sup>, Peter Ponsaerts<sup>4</sup>, Manolis Pasparakis<sup>5</sup>, and Anna M. Planas<sup>1,2,\*</sup>

<sup>1</sup> Department of Brain Ischemia and Neurodegeneration, Institut d'Investigacions Biomèdiques de Barcelona (IIBB), Consejo Superior de Investigaciones Científicas (CSIC), Barcelona, Spain

<sup>2</sup> Area of Neurociències, Institut d'Investigacions Biomèdiques August Pi i Sunyer (IDIBAPS), Barcelona, Spain

<sup>3</sup> Fundació Clínic, Barcelona, Spain

<sup>4</sup> Laboratory of Experimental Hematology, University of Antwerp, Antwerp, Belgium

<sup>5</sup> CECAD Research Center, Institute for Genetics, University of Cologne, Cologne, Germany

#### Corresponding author:

Anna M. Planas, PhD  
IIBB-CSIC, IDIBAPS,  
Rosselló 161, planta 6,  
08036-Barcelona, Spain.  
e-mail: [anna.planas@iibb.csic.es](mailto:anna.planas@iibb.csic.es)  
Tel: +34-93 363 83 27

**Supplementary Table S1. List of primer sequences for PCR**

| Gene     | Taqman ID Assay                                                      | Accession no.  | Amplicon length (bp) | Exon boundary        |
|----------|----------------------------------------------------------------------|----------------|----------------------|----------------------|
| Acta2    | Mm01546133_m1                                                        | NM_007392.3    | 88                   | Exon 1-2             |
| Activin1 | Mm00434339_m1                                                        | NM_008380.1    | 65                   | Exon 2-3             |
| Areg     | Mm01354339_m1                                                        | NM_009704.3    | 142                  | Exon 5-6             |
| Arg1     | Mm00475988_m1                                                        | NM_007482.3    | 65                   | Exon 1-2             |
| Bdnf     | Mm04230607_s1                                                        | NM_001048139.1 | 92                   | Exon 2-2             |
| Ccl2     | Mm00441242_m1                                                        | NM_011333.3    | 74                   | Exon 1-2             |
| Ccr2     | Mm00438270_m1                                                        | NM_009915.2    | 100                  | Exon 2-3             |
| Chil3    | Mm00657889_mH                                                        | NM_009892.2    | 90                   | N/A                  |
| Csf2     | Mm01290062_m1                                                        | NM_009969.4    | 125                  | Exon 2-3             |
| Egfr     | Mm01187858_m1                                                        | NM_007912.4    | 101                  | Exon 2-3             |
| Fgf2     | Mm01285715_m1                                                        | NM_008006.2    | 119                  | Exon 2-3             |
| Flk1     | Mm01222421_m1                                                        | NM_010612.2    | 64                   | Exon 13-14           |
| Flt1     | Mm00438980_m1                                                        | NM_010228.3    | 59                   | Exon 15-16           |
| Flt4     | Mm01292604_m1                                                        | NM_008029.3    | 72                   | Exon 12-13           |
| Gapdh    | Mm99999915_g1                                                        | NM_001289726.1 | 107                  | Exon 2-3             |
| Hprt1    | Mm00446968_m1                                                        | NM_013556.2    | 65                   | Exon 6-7             |
| Il10     | Mm00439614_m1                                                        | NM_010548.2    | 79                   | Exon 1-2             |
| Il1b     | Mm00434228_m1                                                        | NM_008361.3    | 90                   | Exon 3-4             |
| Il6      | Mm00446190_m1                                                        | NM_031168.2    | 78                   | Exon 2-3             |
| Mmp2     | Mm00439498_m1                                                        | NM_008610.2    | 62                   | Exon 2-3             |
| Mmp3     | Mm00440295_m1                                                        | NM_010809.1    | 66                   | Exon 4-5             |
| Mmp9     | Mm00442991_m1                                                        | NM_013599.3    | 76                   | Exon 12-13           |
| Nos2     | Mm00440502_m1                                                        | NM_010927.3    | 66                   | Exon 21-22           |
| Reg3b    | Mm00440616_g1                                                        | NM_011036.1    | 73                   | Exon 5-6             |
| Tmem119  | Mm00525305_m1                                                        | NM_146162.2    | 72                   | Exon 1-2             |
| Tnfa     | Mm00443258_m1                                                        | NM_013693.3    | 81                   | Exon 1-2             |
| Vegfa    | Mm00437306_m1                                                        | NM_001025250.3 | 61                   | Exon 3-4             |
| Vegfc    | Mm00437310_m1                                                        | NM_009506.2    | 78                   | Exon 1-2             |
| Gene     | SYBR green Primer sequence 5' - 3'                                   | Accession no.  | Amplicon length (bp) | Exon boundary        |
| Angpt1   | F: 5'-GGAACCGAGCCTACTCACAG-3'<br>R: 5'-CGAACCACCAACCTCCTGTT-3'       | NM_009640.4    | 204                  | Exon 7<br>Exon 8-9   |
| Angpt2   | F: 5'-AGTCAGGACTCACCACAGT-3'<br>R: 5'-GCCATCTTCTCGGTGTTGGA-3'        | NM_007426.4    | 128                  | Exon 5<br>Exon 6     |
| Gfap     | F: 5'-AAGGTCCGCTTCTGAA-3'<br>R: 5'-GGCTCGAAGCTGGTTCAGTT-3'           | NM_010277.3    | 63                   | Exon 1<br>Exon 1     |
| Igf1     | F: 5'-GTGGACCGAGGGGCTTTTACTTC-3'<br>R: 5'-TTTGCAGCTTCGTTTTCTTGTGG-3' | NM_010512.5    | 246                  | Exon 1-2<br>Exon 3-4 |
| Il23a    | F: 5'-GACCCACAAGGACTCAAGGAC-3'<br>R: 5'-ATGGGGCTATCAGGGAGTAGAG-3'    | NM_031252.2    | 131                  | Exon 2<br>Exon 3     |
| Pdgfb    | F: 5'-TTGAACATGACCCGAGCACA-3'<br>R: 5'-AGATGGGCTTCTTTCGCACA-3'       | NM_011057.4    | 310                  | Exon 3<br>Exon 5     |
| Pdgfbr   | F: 5'-AGGAGTGATACCAGCTTTAGTCC-3'<br>R: 5'-CCGAGCAGGTCAGAACAAAGG-3'   | NM_008809.2    | 152                  | Exon 2<br>Exon 3     |
| Rpl14    | F: 5'-GGCTTTAGTGGATGGACCCT-3'<br>R: 5'-ATTGATATCCGCTTCTCCC-3'        | NM_025974.2    | 143                  | Exon 3<br>Exon 4     |
| Tgfb1    | F: 5'-TGCTTCAGCTCCACAGAGAA-3'<br>R: 5'-TACTGTGTGTCCAGGCTCCA-3'       | NM_011577.2    | 155                  | Exon 5-6<br>Exon 6   |

## Supplementary Figure S1

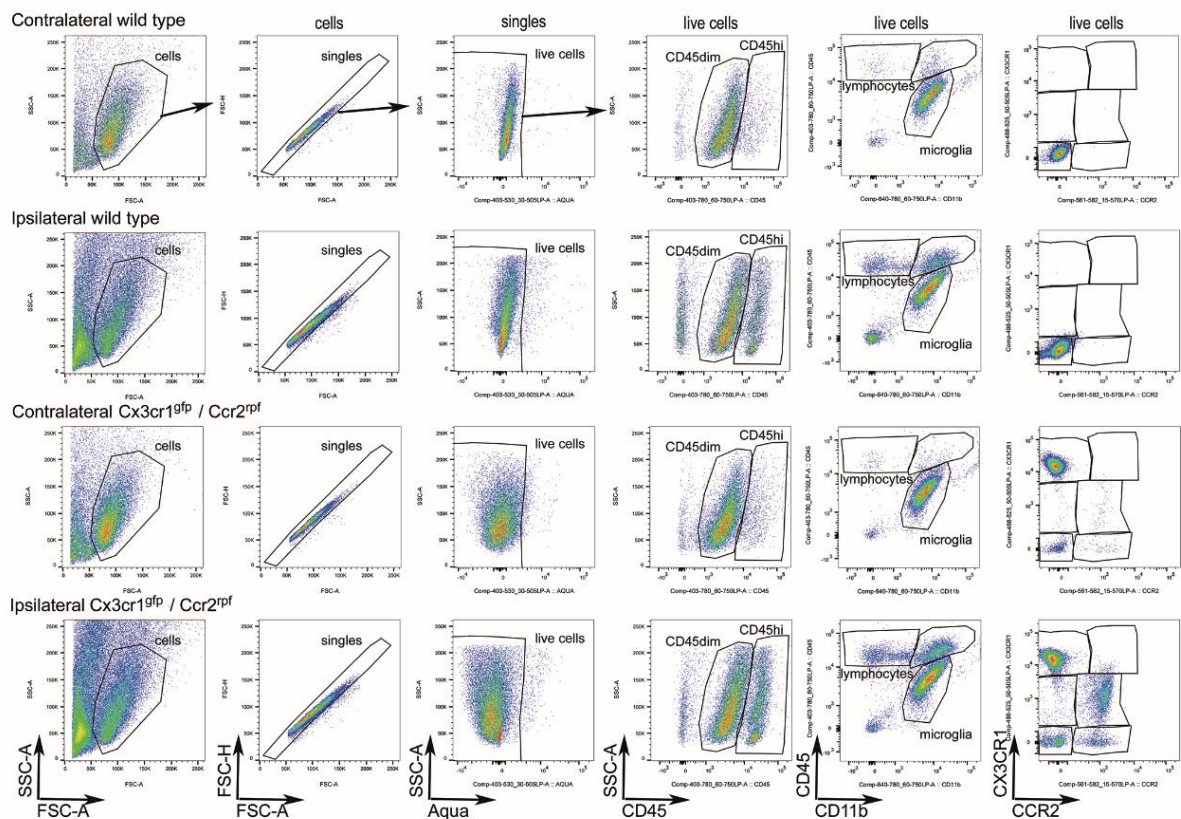

### Supplementary Fig. S1 Gating strategy to identify the different cell populations expressing CCR2<sup>rfp</sup> and/or CX3CR1<sup>gfp</sup> in the ischemic brain tissue of Ccr2<sup>rfp/+</sup>Cx3cr1<sup>gfp/+</sup> transgenic mice.

We studied the contralateral and ipsilateral (ischemic) cerebral cortex of wild type mice and double-transgenic Ccr2<sup>rfp/+</sup>Cx3cr1<sup>gfp/+</sup> mice 4 days post-ischemia. CD45<sup>hi</sup> cells increase in the ipsilateral vs. the contralateral hemisphere. GFP<sup>+</sup> cells (CX3CR1) cells and RFP<sup>+</sup> (CCR2) cells are not seen in the wild type mice. Ccr2<sup>rfp/+</sup>Cx3cr1<sup>gfp/+</sup> mice show CX3CR1-gfp<sup>hi</sup> microglia in the contralateral and ipsilateral hemisphere. In addition, other CX3CR1-gfp<sup>+</sup> cells and/or CCR2-rfp<sup>+</sup> cells become apparent in the ipsilateral hemisphere.

## Supplementary Figure S2

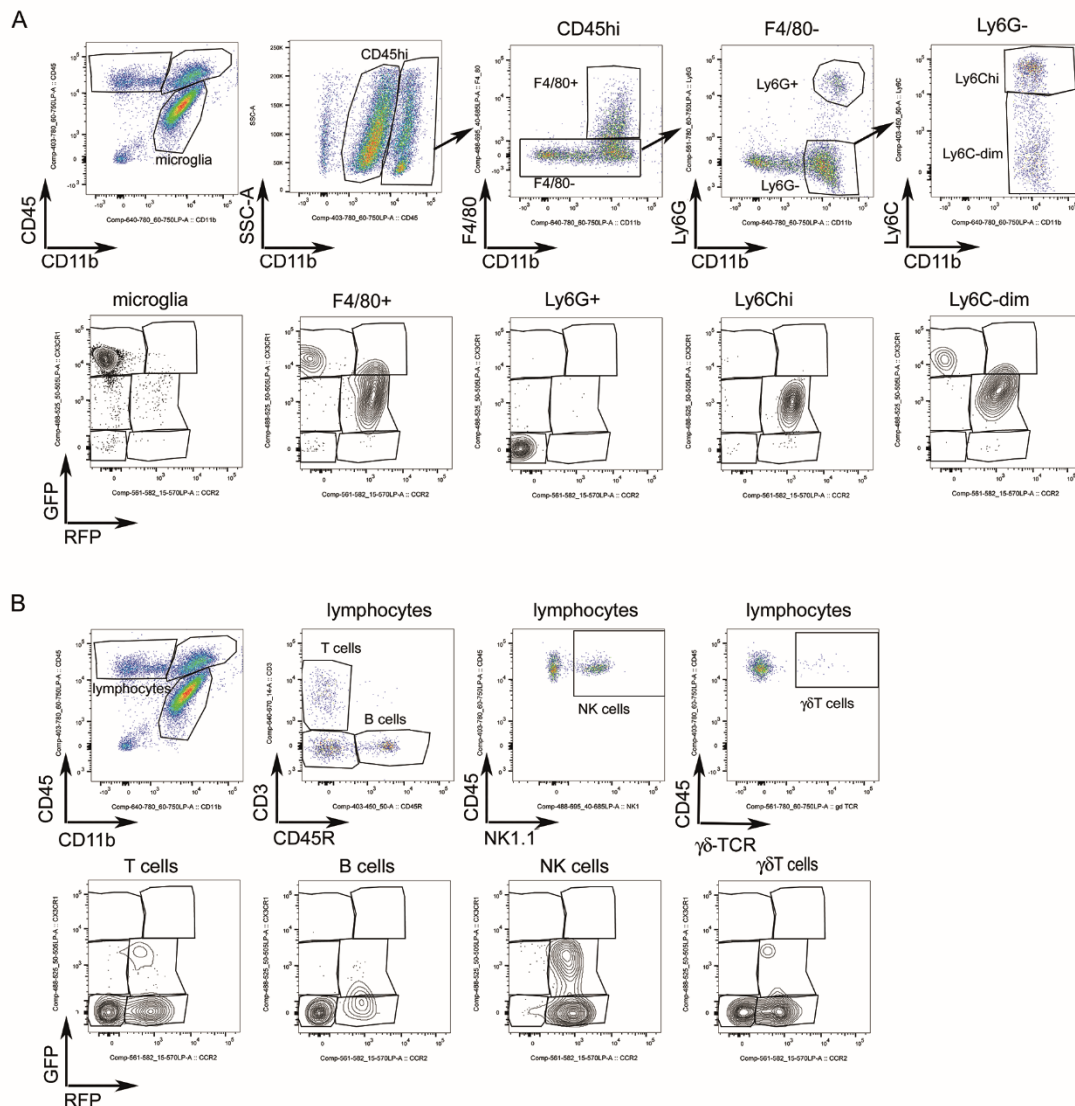

**Supplementary Fig. S2. CCR2 and CX3CR1 expression in different cells subsets as assessed with GFP and RFP fluorescence.** Following gating in Supplementary Fig 1, GFP and RFP fluorescence in the ischemic brain tissue (4 days post-ischemia) is shown in the gates of: A) myeloid cells, including microglia, F4/80 macrophages, neutrophils (Ly6G<sup>+</sup>), and monocytes (Ly6G<sup>-</sup> Ly6C<sup>+</sup>); B) lymphocytes, including B and T cells, NKs cells and  $\gamma\delta$ -TCR cells. Microglia are GFP<sup>hi</sup>; F4/80<sup>+</sup> macrophages are RFP<sup>+</sup> GFP<sup>+</sup>; Ly6G<sup>+</sup> neutrophils are RFP<sup>-</sup> GFP<sup>+</sup>; and Ly6C<sup>+</sup> monocytes show different degrees of RFP and GFP. Lymphocytes show major subsets of CCR2<sup>+</sup> RFP<sup>+</sup> cells and a few CX3CR1<sup>+</sup> GFP<sup>+</sup> cells.

### Supplementary Figure S3

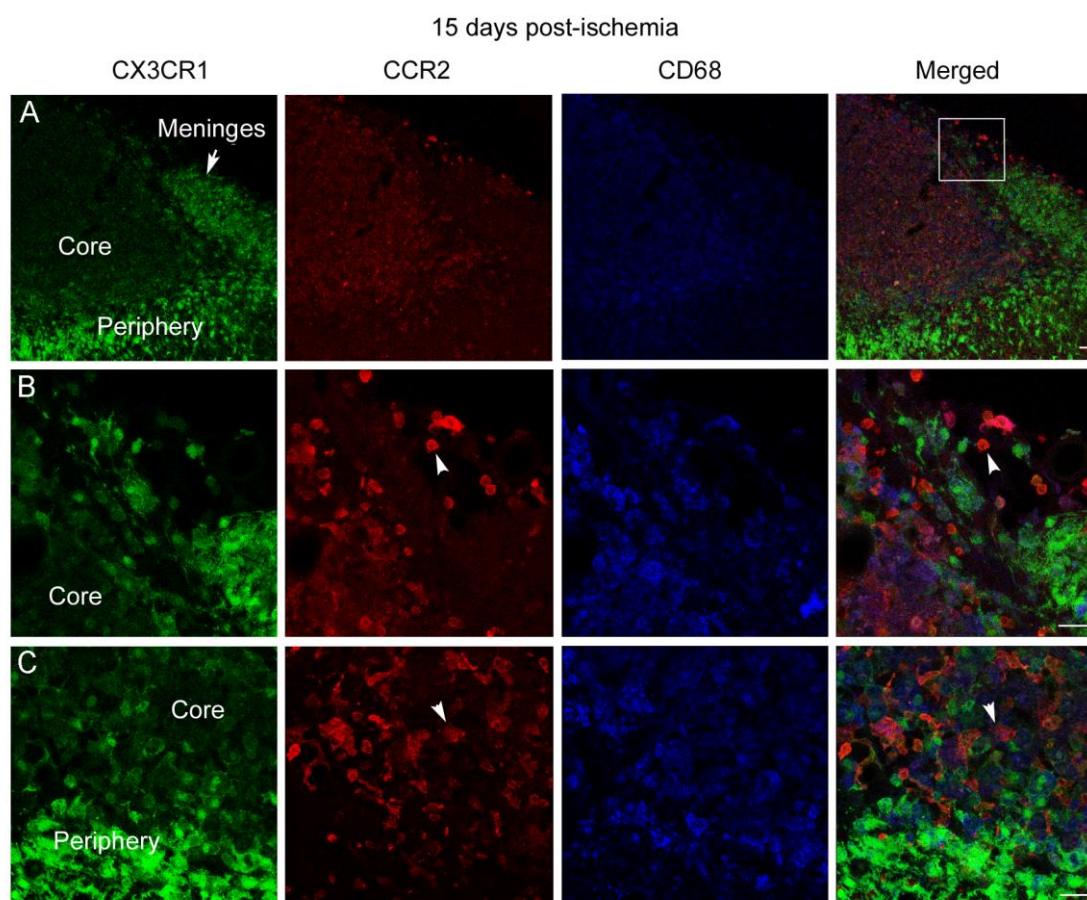

**Supplementary Fig. S3. Infiltrating leukocytes 15 days post-ischemia.** Subpopulations of leukocytes infiltrating the ischemic brain tissue at day 15 in  $Ccr2^{rfp/+}Cx3cr1^{gfp/+}$  mice ( $n=3$ ). A dense layer of very bright  $gfp^+$  microglia (green) surrounds and clearly delimitates the ischemic core, which is packed with high density of cells with  $rfp$  fluorescence (red),  $gfp^{low}$ , and positive for CD68 (blue). Microglial cells are located at the border of the lesion. They show large cell bodies with short and thick ramifications. Infiltrating small, round, and very bright  $rfp^+$  leukocytes are prominent within the core of the lesion, at the interface between the infarcted core and also within the peripheral microglial layer, and at the leptomeninges. Scale bar= 20  $\mu m$ .

Supplementary Figure. S4

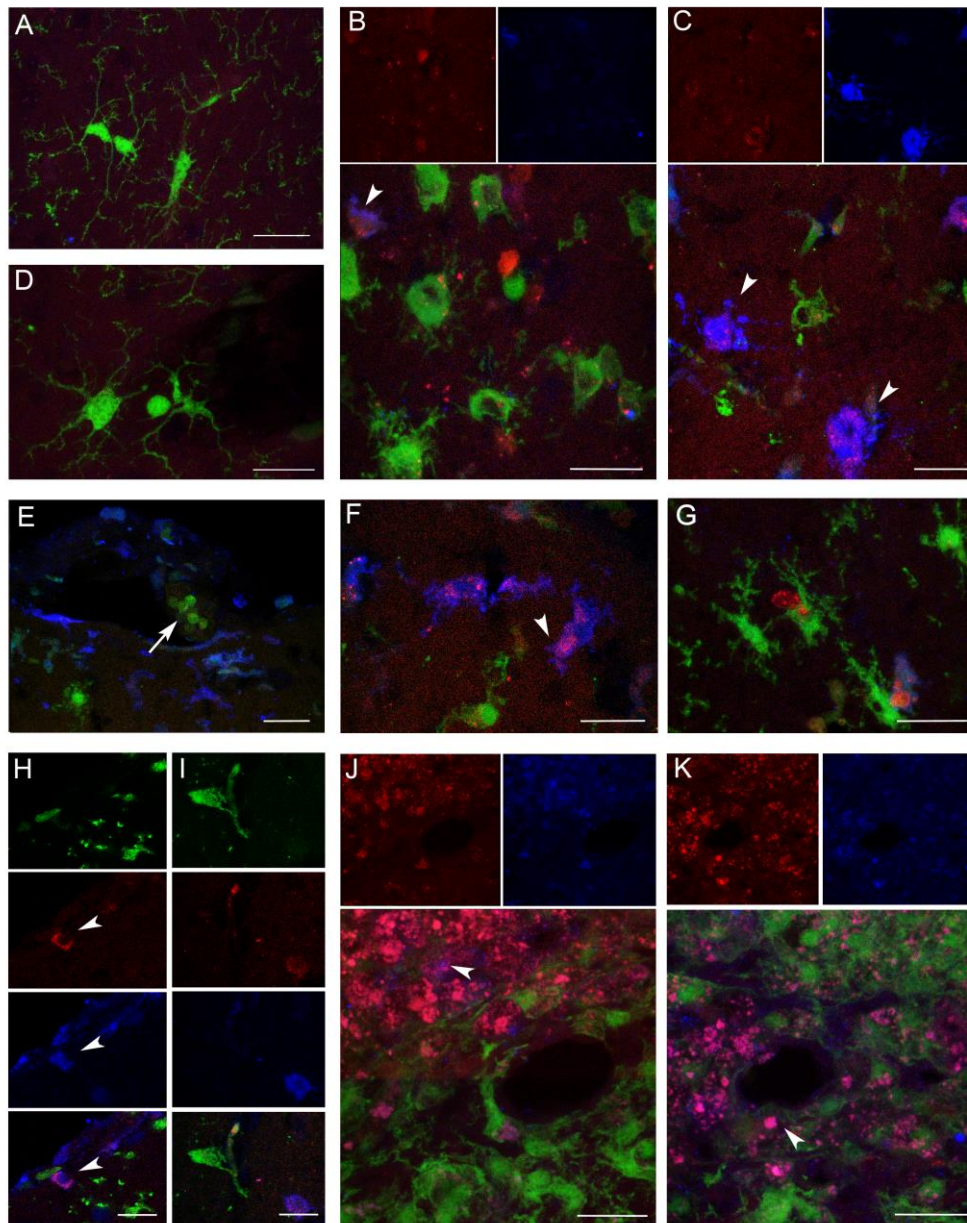

**Supplementary Fig. S4. Subsets of infiltrating monocytes, but not microglia, express Arginase-1.** Expression of Arg1 (blue) in the  $Ccr2^{rfp/+}Cx3cr1^{gfp/+}$  transgenic mice 4 days (A-I) and 15 days (J-K) post-ischemia. Microglial ( $CX3CR1^{hi}$ , intense green fluorescence) cells do not express Arg1, neither in the control tissue (A) nor at the periphery of the lesion (D). In the border (B) and core (C-I) of the lesion, Arg1 immunoreactivity is detected in RFP<sup>+</sup> cells (red, arrowheads), whereas most GFP<sup>+</sup> cells do not express Arg1 (arrows). At 15 days Arg1<sup>+</sup> cells are found in the core of the lesion in cells expressing RFP (J-K). Scale bar: 20  $\mu$ m.

## Supplementary Figure S5

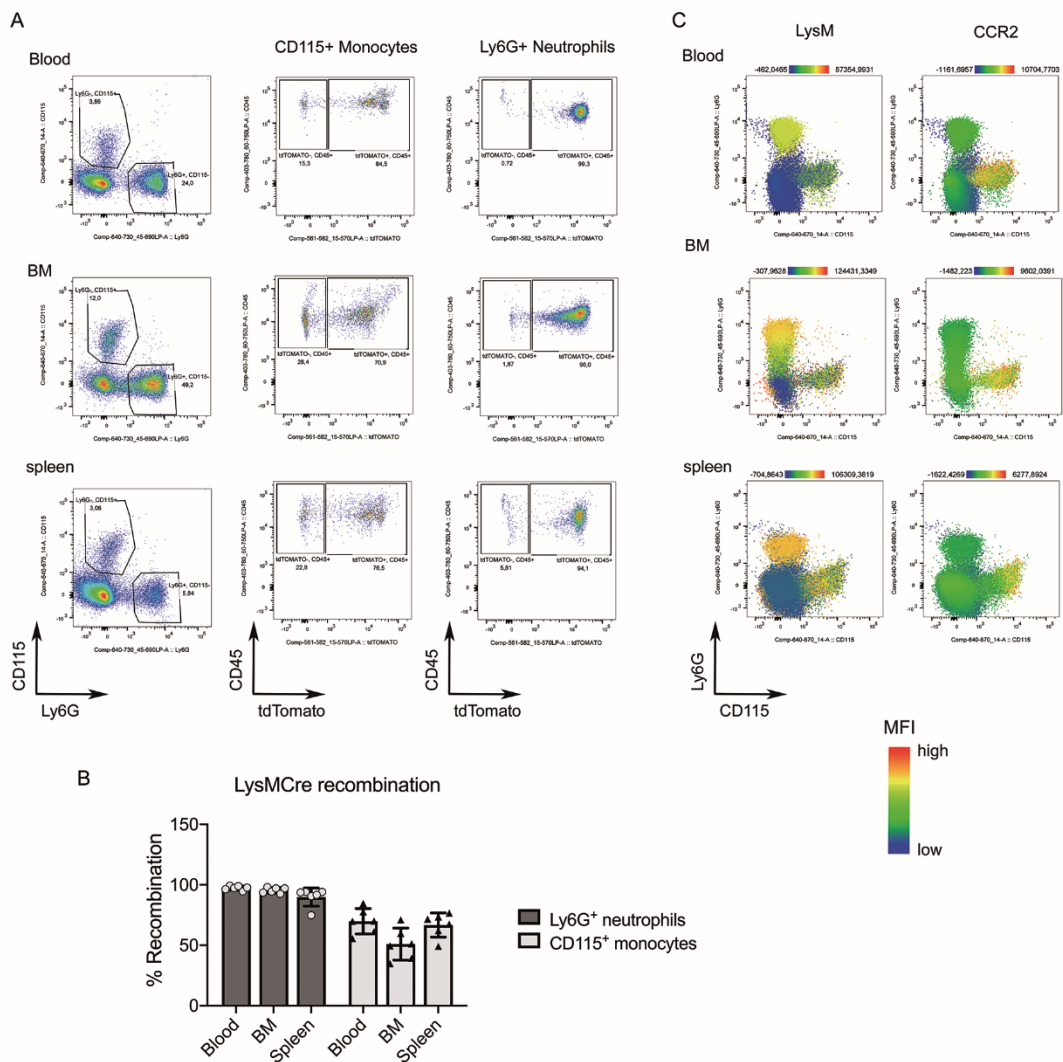

**Supplementary Fig. S5. Cre-recombination and CCR2 expression in different myeloid cells as assessed in LysMcre:Rosa26-tdT mice.** A) Gating strategy to assess the efficiency of LysMcre recombination in monocytes (CD115<sup>+</sup>) and neutrophils (Ly6G<sup>+</sup>) of LysMcre:Rosa26-tdT mice in blood, bone marrow (BM) and spleen. B) Quantification of LysMcre recombination in monocytes and neutrophils in the above organs (n=6). C) In spite of very high LysMcre-recombination in Ly6G<sup>+</sup> neutrophils, the expression of CCR2 in these cells is very low. In contrast, CCR2 expression is high in monocytes. Color code indicates the value of mean fluorescence intensity (MFI).

**Supplementary Figure S6**

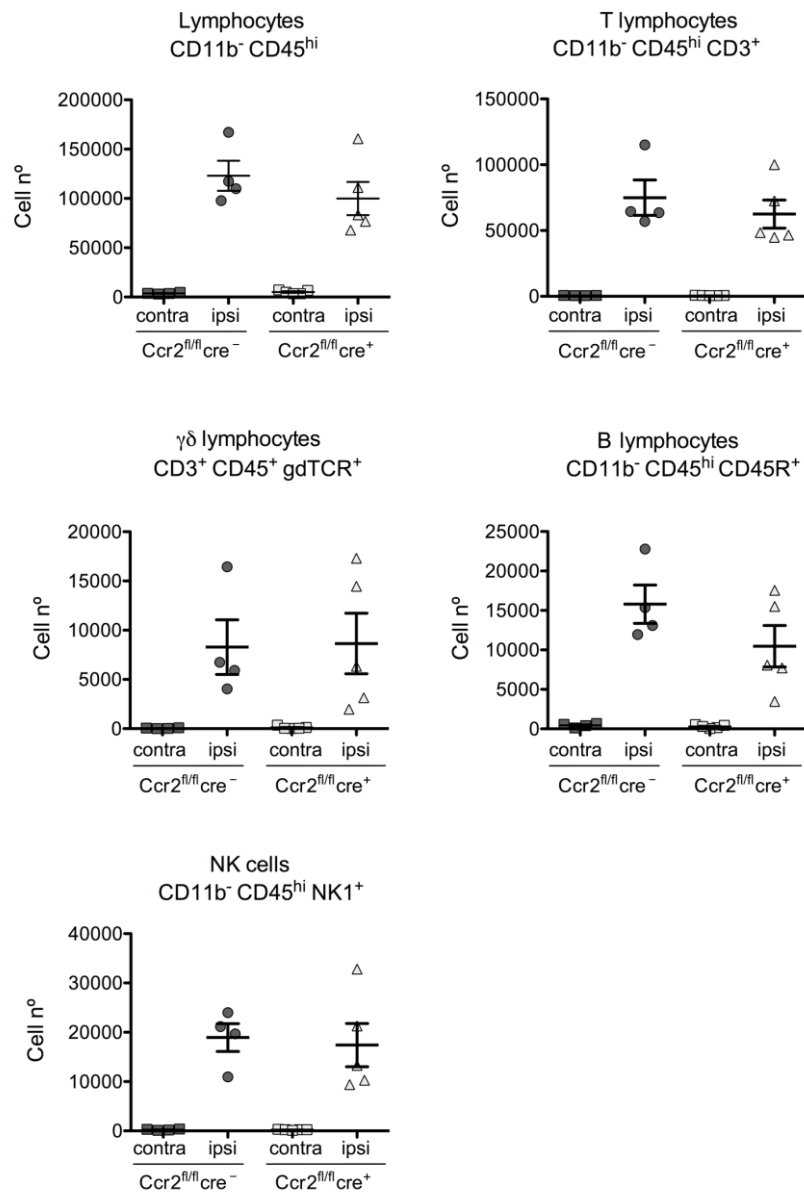

**Supplementary Fig. S6. Cell counts for infiltrating lymphoid cells in the brain tissue one-day post-ischemia in mice with CCR2-deficient monocytes and controls.** Ischemia was induced in littermate  $Ccr2^{fl/fl} LysMcre^{+}$  mice (mice with CCR2-deficient monocytes, n=5) and  $Ccr2^{fl/fl} LysMcre^{-}$  mice (control genotype, n=4) and the contralateral (contra) and ipsilateral (ipsi, ischemic) cerebral cortex was studied 1 day later by flow cytometry. Graphs show absolute cell numbers for the different lymphoid cell populations. Lymphocytes infiltrate the ipsilateral brain hemisphere after ischemia but we found no statistically significant differences between genotypes (Two-way ANOVA by genotype and brain region).



### Supplementary Figure S7

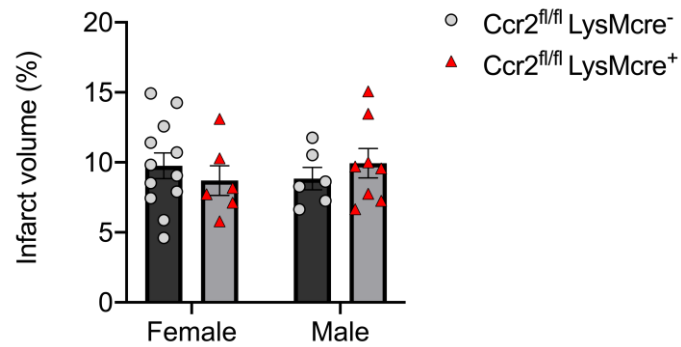

**Supplementary Fig. S7. No sex or genotype differences in infarct volume 15 days post-ischemia.** We analyzed whether infarct volume (%) was different as a function of sex (n=18 female and n=14 male) and genotype (n=18  $Ccr2^{fl/fl} LysMcre^{-}$  and n= 14  $Ccr2^{fl/fl} LysMcre^{+}$ ) by two-way ANOVA. There were no statistically significant differences between groups: sex effect p=0.878, genotype effect p=0.987, with no interaction p=0.313.

## Supplementary Figure S8

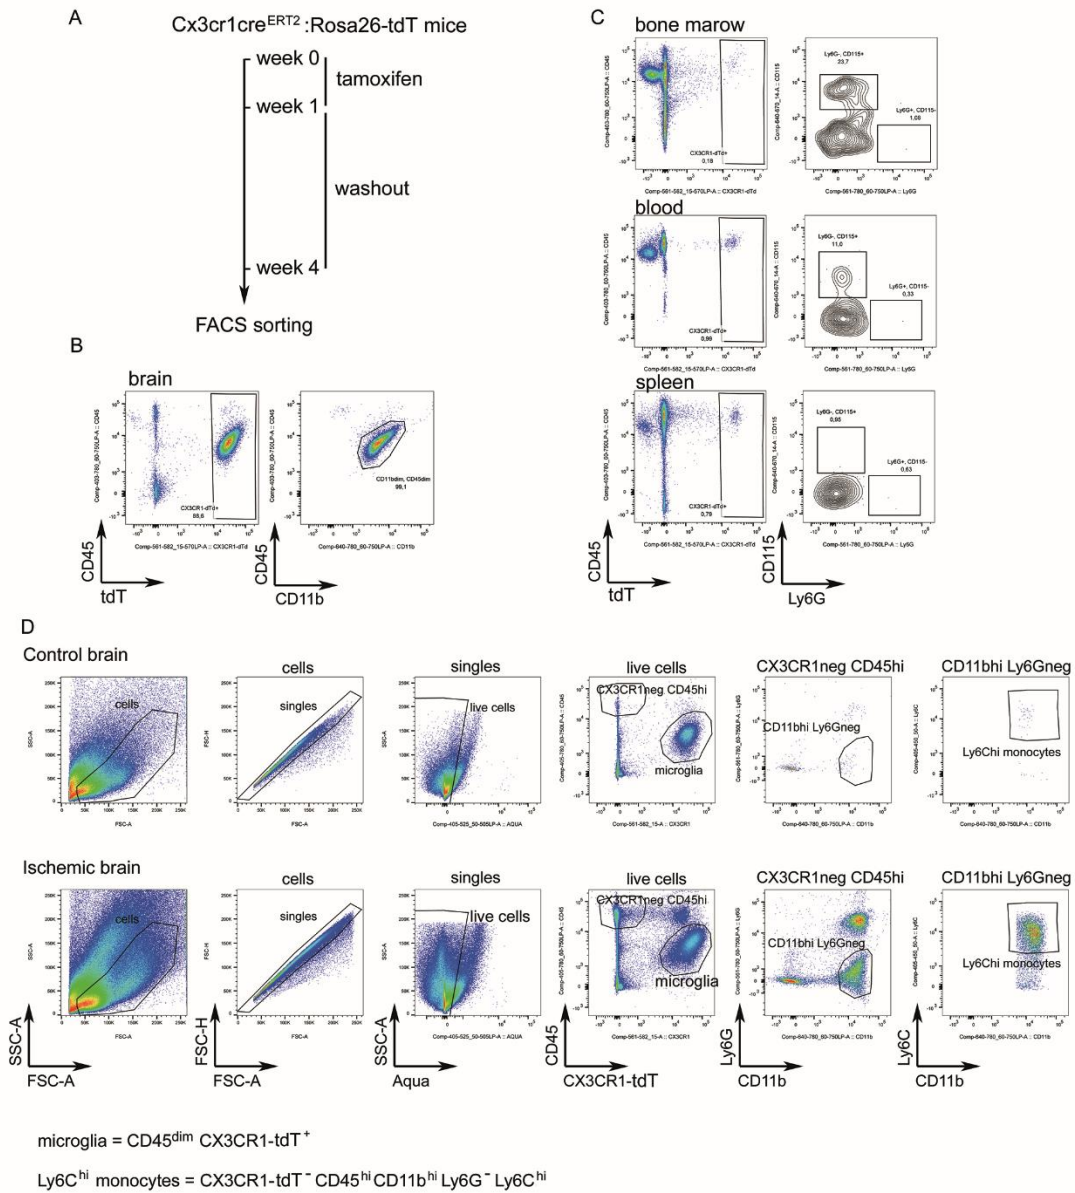

**Supplementary Fig. S8. Strategy for FACS cell sorting microglia and Ly6C<sup>hi</sup> monocytes.** A) We used Cx3cr1cre<sup>ERT2</sup>:Rosa26-tdT mice that received tamoxifen during one week, followed by 3 weeks of washout prior to induction of ischemia and FACS cell sorting at day 1. B) Flow cytometry plots showing that all red fluorescent (tdT) cells of the ischemic brain are CD11b<sup>dim</sup>CD45<sup>dim</sup> microglial cells (99.1%). C) Very few tdT<sup>+</sup> cells (<1%) are detected in the bone marrow, blood and spleen, and the gates for monocytes (CD115<sup>+</sup>) and neutrophils (Ly6G<sup>+</sup>) show absence of tdT<sup>+</sup> cells. D) Sorting strategy from the ischemic and control brain tissue for microglia (CD45<sup>dim</sup> Cx3cr1-tdT<sup>+</sup> cells), and Ly6C<sup>hi</sup> monocytes (CX3CR1-tdT<sup>negative</sup> CD45<sup>hi</sup> CD11b<sup>hi</sup> Ly6G<sup>negative</sup> Ly6C<sup>hi</sup>).
